# Supplementary material
Source: PubMed Central journal article supplement (PMC4298498)
Supplement: JCM.03104-14_zjm999094005so1.pdf [file JCM.03104-14_zjm999094005so1.pdf]

## 1 **Methods**

### 2 **Antimicrobial susceptibility testing and pulsed field gel electrophoresis**

3 Minimum inhibitory concentration (MIC) determination was performed using a commercially  
4 prepared dehydrated panel (Sensititre; TREK Diagnostic Systems Ltd., East  
5 Grinstead, England) and according to previously published methodology (8). The tested  
6 antimicrobials / classes in this study have been listed in Table 1. Clinical and Laboratory  
7 Standards Institute (CLSI) (3) clinical breakpoints interpretative criteria for resistance (R)  
8 were used except for the following antimicrobials; azithromycin, ceftiofur, colistin,  
9 florfenicol, neomycin, spectinomycin, and streptomycin, respectively where epidemiological  
10 cut-off values according to EUCAST recommendations was used (<http://www.eucast.org>).  
11 Apramycin was interpreted according to research results from DTU-Food. Quality control  
12 was performed by using reference strain *E. coli* ATCC 25922 according to CLSI guidelines  
13 (3,4).

14 Procedures for conducting PFGE of the two *S. Typhi* isolates included this study have  
15 previously been described and according to manufactures recommendation (8,13).

16 A XML file of the PFGE profiles was forwarded to US CDC where PFGE patterns were  
17 assigned based on the PulseNet USA database and the Global Typhi database.

18

### 19 **Whole genome sequencing, multilocus sequence typing, antimicrobial resistance genes,** 20 **plasmid replicons, plasmid multilocus sequence typing, and restriction-modification** 21 **system**

22 Chromosomal DNA of the two *S. Typhi* isolates and plasmid DNA of transformant  
23 #TY5359x MT102RN was extracted using an Invitrogen Easy-DNA™ Kit (Invitrogen,  
24 Carlsbad, CA, USA) and DNA concentrations were determined using the Qubit dsDNA BR  
25 assay kit (Invitrogen). The genomic DNA was prepared for Illumina pair-end sequencing

1 using the Illumina (Illumina, Inc., San Diego, CA) NexteraXT® Guide 150319425031942  
2 following the protocol revision C  
3 ([http://support.illumina.com/downloads/nextera\\_xt\\_sample\\_preparation\\_guide\\_15031942.ht](http://support.illumina.com/downloads/nextera_xt_sample_preparation_guide_15031942.html)  
4 [ml](http://support.illumina.com/downloads/nextera_xt_sample_preparation_guide_15031942.html)). A sample of the pooled NexteraXT libraries using the Nextera XT DNA sample  
5 preparation kit (Illumina, cat. No. FC-131-1024) was loaded onto a Illumina MiSeq reagent  
6 cartridge using MiSeq Reagent Kit v2 and 500 cycles with a Standard Flow Cell. The  
7 libraries were sequenced using an Illumina platform (Illumina, Inc., San Diego, CA) and  
8 MiSeq Control Software 2.3.0.3. Twenty previously published *S. Typhi* genomic sequences;  
9 the only ones containing full metadata profile were obtained from GenBank and Sanger  
10 Institute (accessed 20/12/2013). A total of 14 genomes from Asia were downloaded, of which  
11 11 were from GenBank while the other three genomes were retrieved from Sanger bacterial  
12 genome database. (<http://www.sanger.ac.uk/resources/downloads/bacteria/>). Full genomic  
13 information is shown in Supplementary Table 1A.

14 Raw sequence data have been submitted to the European Nucleotide Archive  
15 <http://www.ebi.ac.uk/ena/data/view/PRJEB6961> under accession no. ERS525820 and  
16 ERS525821. The raw reads were assembled using the pipeline available on the Center for  
17 Genomic Epidemiology (CGE) ([www.genomicepidemiology.org](http://www.genomicepidemiology.org)) which is based on Velvet,  
18 algorithms for *de novo* short reads assembly (20). A complete list of genomic sequence data  
19 is available in the Supplementary Table 1A.

20 The *de novo* assembled sequences including the plasmid DNA of the transformant #TY3559  
21 x MT102RN were analyzed using similar pipelines available on the CGE website. The web-  
22 servers; MLST version 1.7, ResFinder version 2.0, PlasmidFinder 1.1, and pMLST 1.2 (19)  
23 were used to identify the MLST sequence type for *Salmonella enterica*, the plasmid  
24 replicons, the plasmid multilocus sequence typing and acquired antimicrobial resistance

1 genes with a selected threshold equal to 85.00%. The identity and results of the Resfinder  
2 were compared with phenotypic antimicrobial susceptibility testing results.

3

4 The sequence similarity of the identified plasmids were assessed based on a BLAST analysis  
5 of the contigs related to the plasmids of the two *S. Typhi* isolates against the scaffold of a  
6 previously published incHI2/incHI2A plasmid (pEC-IMPQ. Genbank acc no. EU855788).

7 Visual evaluation of the BLAST comparison was performed using the software BLAST Ring  
8 Image Generator (BRIG) v0.95 (1). In addition, a reference assembly against pEC-IMPQ of  
9 plasmid contigs from the two wild type strains was performed using the SNPtree webserver  
10 as described below.

11

12 Integrity of the Restriction-Modification Systems (RMS) present in the two *S. Typhi* isolates  
13 were analyzed compared to 11 *S. Typhi* genomes of sufficient quality and full meta-data  
14 profile by using the web-server Restriction-ModificationFinder version 1.0 available from the  
15 CGE website ([www.genomicepidemiology.org](http://www.genomicepidemiology.org)), with a threshold and minimum length equal  
16 to 80.00%. The webserver is based on the ResFinder software (19), and the database includes  
17 nucleotide sequences of all Type I-IV restriction- and modification enzymes with their  
18 cognate subunits recorded in REBASE (14).

19 The RM results were further explored by blasting the results against the Conserved Domain  
20 Database at NCBI (<http://www.ncbi.nlm.nih.gov/Structure/cdd/wrpsb.cgi>), and compared  
21 with the reference genome of *S. Typhi* str. CT18.

22

23 **Phylogenetic structure of *S. Typhi* using Single Nucleotide Polymorphisms,**  
24 **identification of *S. Typhi* haplotypes, and genomic deletions**

1 Single nucleotide polymorphisms (SNPs) were determined using the pipeline available on the  
2 Center for Genomic Epidemiology ([www.genomicepidemiology.org](http://www.genomicepidemiology.org)) (9) The pipeline  
3 contains various freely available SNP analysis software. Fundamentally, the paired-end reads  
4 from ESBL isolates were aligned against the reference genome, *S. Typhi* str. CT18 (National  
5 Center for Biotechnology Information, accession: AL513382, length of 4·809·037 bp), using  
6 Burrows-Wheeler Aligner (BWA)(10). SAMtools (11) ‘mpileup’ command and bedtools (12)  
7 [ref] were used to determine and filter SNPs.

8 Assembled genomes or contigs were aligned against the reference genome using the  
9 application “Nucmer” of MUMmer version 3.23 (5). SNPs were identified from the  
10 alignments using “Show-snps” (using option “-Cl1rT”) from MUMmer. Subsequently, SNPs  
11 were selected when meeting the following criteria: 1) a minimum distance of 15 bps between  
12 each SNP, and 2) all indels were excluded. The qualified SNPs from each genome were  
13 concatenated to a single alignment corresponding to position of the reference genome using  
14 an in-house Perl script. In cases where SNPs were absent in the reference genome, they were  
15 interpreted as not being a variation and the relatively base from the reference genome was  
16 expected (9). The concatenated sequences were subjected to multiple alignments using  
17 MUSCLE from MEGA5 (18). The final phylogenetic SNP tree was computed by MEGA5  
18 using the maximum likelihood method (17) of 1,000 bootstrap replicates (6). All SNPs  
19 identified between the two isolates and the included public available genomes are listed in the  
20 Supplementary Table 1B.

21

22 The haplotype of both genomes was assigned based on biallelic polymorphisms positions  
23 (BiP) previously described (15). Positions based on WGST are listed in the Supplementary  
24 Table 1C.

25

1 A BLAST atlas based on BLASTP (7) was used to detect putative deletions in a comparison  
2 of the genomes against the reference genome; CT18. Details of the genomic deletions  
3 detected among the isolates are listed in the Supplementary Table 1D.

4

#### 5 **Transferability of *bla*<sub>SHV-12</sub> genes by conjugation**

6 Plate-mating experiments were performed with the two *S. Typhi* isolates as donors and  
7 plasmid-free, rifampicin and nalidixic acid resistant *E. coli* MT102RN as recipients (16). The  
8 strains were grown to both late exponential as well as stationary phase, mixed (1:1) and  
9 incubated on solid blood agar at both room temperature and at 37°C for 18 h.

10 Transconjugants were selected on BHI medium supplemented with 25 µg/ml rifampicin, 25  
11 µg/ml nalidixic acid, and 4 µg/ml ceftriaxone.

12

#### 13 **Plasmid characterization**

14 A transformant from the conjugation experiment described above was subjected to plasmid  
15 purification using Qiagen tip-100 as described by the manufacture (Qiagen, Hilden,  
16 Germany) followed by whole genome sequencing and sequence analysis.

17 The draft assembly of the plasmid was subsequently uploaded to the web-services as  
18 described above to confirm the presence of the *bla*<sub>SHV-12</sub> gene and origins or replication in the  
19 plasmid of the transformant #TY5359x MT102RN as well as presence of any non-ESC  
20 resistance determinants potentially co-transferred with the ESC plasmids.

21

#### 22 **S1 digestion for plasmid size determination**

23 PFGE with S1 nuclease (Promega, Madison, Michigan, USA) digestion of whole genomic  
24 DNA performed as described below was used to estimate sizes of larger plasmids present in  
25 wild type isolates as well as transformants (2). Following pre-incubation for 10 min in 1:10

1 diluted S1 buffer, 2 mm slices of PFGE plugs made from cultures with an OD<sub>620</sub> of 0.6 were  
2 digested with 5 U of S1 (Promega, Madison, Michigan, USA) for 45 min at 37°C. The slices  
3 were post-incubated on ice for 10 min in 200 µL of ice-cold TE-buffer (10:1), loaded on the  
4 gel and run on a CHEF-DR III device (Bio-Rad, Hercules, California, USA) with a pulse time  
5 of 6.8 s – 38.4 s at 6 V/cm for 19 h. The reference strain *S. Braenderup* H9812 digested with  
6 *Xba*I was used as size marker.

7

## 8 Reference List

9

- 10 1. **Alikhan, N. F., N. K. Petty, N. L. Ben Zakour, and S. A. Beatson.** 2011. BLAST  
11 Ring Image Generator (BRIG): simple prokaryote genome comparisons.  
12 BMC.Genomics. **12:402.** doi: **10.1186/1471-2164-12-402.**: 402-412.
- 13 2. **Bielak, E., R. D. Bergenholtz, M. S. Jorgensen, S. J. Sorensen, L. H. Hansen, and**  
14 **H. Hasman.** 2011. Investigation of diversity of plasmids carrying the blaTEM-52 gene.  
15 J. Antimicrob. Chemother. **66:** 2465-2474.
- 16 3. **Clinical and Laboratory Standards Institute.** Performance Standards for  
17 Antimicrobial Susceptibility Testing. **M100-S24.** 24th Informational Supplement. 2014.  
18 Wayne, PA, USA.
- 19 4. **Clinical and Laboratory Standards Institute.** Methods for Dilution Antimicrobial  
20 Susceptibility Tests for Bacteria That Grow Aerobically. **M07-A9.** 9th  
21 Edition[Approved Standard]. 2012. Wayne, PA, USA.
- 22 5. **Delcher, A. L., A. Phillippy, J. Carlton, and S. L. Salzberg.** 2002. Fast algorithms for  
23 large-scale genome alignment and comparison. Nucleic Acids Res. **30:**2478-2483.
- 24 6. **Felsenstein J.** 1985. Confidence limits on phylogenies: An approach using the  
25 bootstrap. Evolution **39:** 783-791.
- 26 7. **Hallin, P. F., T. T. Binnewies, and D. W. Ussery.** 2008. The genome BLASTatlas-a  
27 GeneWiz extension for visualization of whole-genome homology. Mol.Biosyst. **4:** 363-  
28 371.
- 29 8. **Hendriksen, R. S., H. S. Le, V. Bortolaia, C. Pulsrikarn, E. M. Nielsen, S.**  
30 **Pornruangmong, P. Chaichana, C. A. Svendsen, F. X. Weill, and F. M. Aarestrup.**  
31 2012. Characterization of isolates of *Salmonella enterica* serovar Stanley, a serovar  
32 endemic to Asia and associated with travel. J. Clin. Microbiol. **50:** 709-720.
- 33 9. **Leekitcharoenphon, P., R. S. Kaas, M. C. Thomsen, C. Friis, S. Rasmussen, and F.**  
34 **M. Aarestrup.** 2012. snpTree--a web-server to identify and construct SNP trees from

- 1 whole genome sequence data. BMC. Genomics. **13**:S6. doi: [10.1186/1471-2164-13-S7-](https://doi.org/10.1186/1471-2164-13-S7-S6)  
2 **S6**.
- 3 10. **Li, H. and R. Durbin.** 2009. Fast and accurate short read alignment with Burrows-  
4 Wheeler transform. *Bioinformatics*. **25**: 1754-1760.
- 5 11. **Li, H., B. Handsaker, A. Wysoker, T. Fennell, J. Ruan, N. Homer, G. Marth, G.**  
6 **Abecasis, and R. Durbin.** 2009. The Sequence Alignment/Map format and SAMtools.  
7 *Bioinformatics*. **25**: 2078-2079.
- 8 12. **Quinlan, A. R. and I. M. Hall.** 2010. BEDTools: a flexible suite of utilities for  
9 comparing genomic features. *Bioinformatics*. **26**: 841-842.
- 10 13. **Ribot, E. M., M. A. Fair, R. Gautom, D. N. Cameron, S. B. Hunter, B.**  
11 **Swaminathan, and T. J. Barrett.** 2006. Standardization of pulsed-field gel  
12 electrophoresis protocols for the subtyping of *Escherichia coli* O157:H7, *Salmonella*,  
13 and *Shigella* for PulseNet. *Foodborne. Pathog. Dis.* **3**: 59-67.
- 14 14. **Roberts, R. J., T. Vincze, J. Posfai, and D. Macelis.** 2010. REBASE--a database for  
15 DNA restriction and modification: enzymes, genes and genomes. *Nucleic Acids Res.*  
16 **38**: D234-D236.
- 17 15. **Roumagnac, P., F. X. Weill, C. Dolecek, S. Baker, S. Brisse, N. T. Chinh, T. A. Le,**  
18 **C. J. Acosta, J. Farrar, G. Dougan, and M. Achtman.** 2006. Evolutionary history of  
19 *Salmonella Typhi*. *Science*. **314**: 1301-1304.
- 20 16. **Sirichote, P., H. Hasman, C. Pulsrikarn, H. C. Schonheyder, J. Samulioniene, S.**  
21 **Pornruangmong, A. Bangtrakulnonth, F. M. Aarestrup, and R. S. Hendriksen.**  
22 2010. Molecular characterization of extended-spectrum cephalosporinase-producing  
23 *Salmonella enterica* serovar Choleraesuis isolates from patients in Thailand and  
24 Denmark. *J. Clin. Microbiol.* **48**: 883-888.
- 25 17. **Tamura, K. and M. Nei.** 1993. Estimation of the number of nucleotide substitutions in  
26 the control region of mitochondrial DNA in humans and chimpanzees. *Mol. Biol. Evol.*  
27 **10**: 512-526.
- 28 18. **Tamura, K., D. Peterson, N. Peterson, G. Stecher, M. Nei, and S. Kumar.** 2011.  
29 MEGA5: molecular evolutionary genetics analysis using maximum likelihood,  
30 evolutionary distance, and maximum parsimony methods. *Mol. Biol. Evol.* **28**: 2731-  
31 2739.
- 32 19. **Zankari, E., H. Hasman, S. Cosentino, M. Vestergaard, S. Rasmussen, O. Lund, F.**  
33 **M. Aarestrup, and M. V. Larsen.** 2012. Identification of acquired antimicrobial  
34 resistance genes. *J. Antimicrob. Chemother.* **67**: 2640-2644.
- 35 20. **Zerbino, D. R. and E. Birney.** 2008. Velvet: algorithms for de novo short read  
36 assembly using de Bruijn graphs. *Genome Res.* **18**: 821-829.  
37  
38  
39  
40
